# Supplementary material for: Fabrication of Ce-doped DUT-52 as a sorbent for dispersive solid phase extraction of estrogens in human urine samples
Source: Royal Society of Chemistry journal article supplement (doi:10.1039/d2ay00795a), 2022-01-01
Supplement: d2ay00795a1.pdf [file d2ay00795a1.pdf]

## Electronic Supplementary Information

### Fabrication of Ce-doped DUT-52 as a sorbent for disperse solid phase extraction of estrogens in human urine samples

Linan Guo,<sup>a</sup> Yahui Wang,<sup>ab</sup> Meng Yan,<sup>a</sup> Xinxin Li,<sup>a</sup> Xinyao Jiang,<sup>a</sup> Manman Wang,<sup>ac</sup> Qian Wang,<sup>a</sup> Xuesheng Wang,<sup>a</sup> Yulan Hao<sup>\*a</sup>

a. School of Public Health, North China University of Science and Technology, No.21 Bohai Road, Caofeidian District, Tangshan 063200, Hebei, China.

b. Qindao University Medical College Affiliated Yantai Yuhuangding Hospital, Yantai 264001, Shandong, China.

c. Key Laboratory of Coal Mine Health and Safety of Hebei Province, School of Public Health, North China University of Science and Technology, Tangshan 063210, Hebei, China.

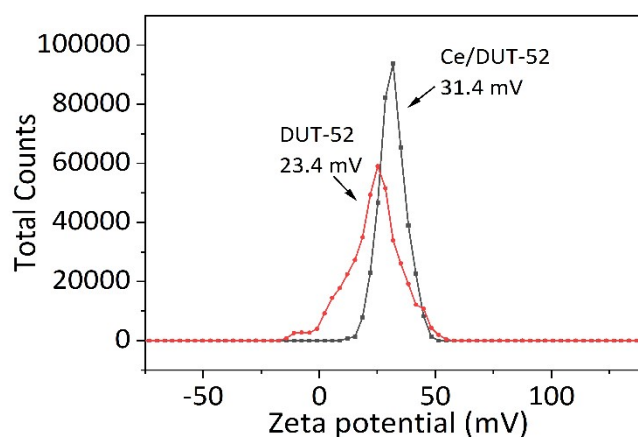

Fig.S1 The Zeta potential of DUT-52 and Ce/DUT-52 in water

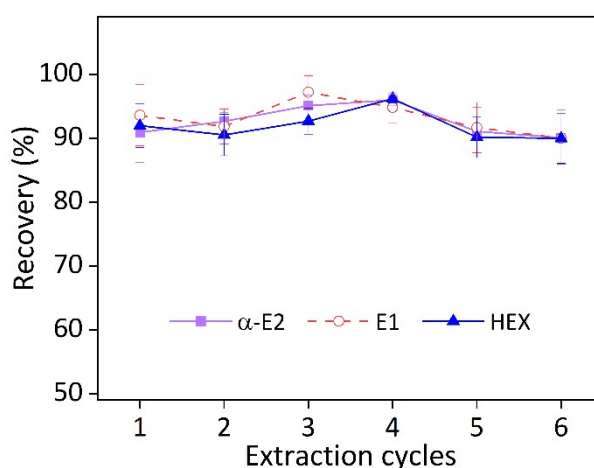

Fig.S2 Effect of adsorption-desorption cycles on the recoveries of three estrogens ( $n=3$ )

XRD and FT-IR analysis were performed on the different batches of Ce/DUT-52. As shown in Fig. S3, the crystal phase and chemical structure of Ce/DUT-52 were in good agreement with different batches, indicating that the adsorbents synthesized from different batches had good reproducibility and stability.

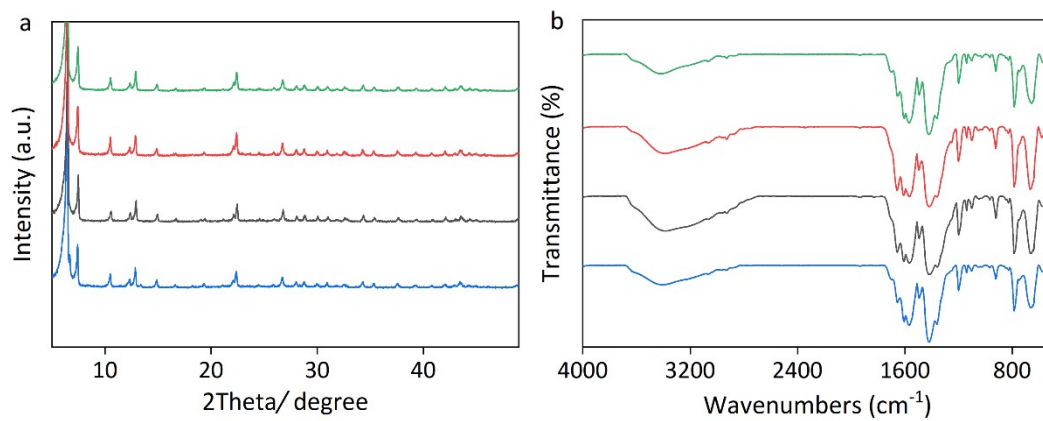

Fig. S3 (a) XRD patterns and (b) FT-IR spectra on different batches of Ce/DUT-52

Table S1 Analytical results for the determination of three estrogens in urine samples ( $n=3$ )

| Type   | Sample       | Analyte      | Found<br>(ng/mL)     | Spiked (ng/mL)  |             |                 |             |                 |             |
|--------|--------------|--------------|----------------------|-----------------|-------------|-----------------|-------------|-----------------|-------------|
|        |              |              |                      | 10              |             | 25              |             | 50              |             |
|        |              |              |                      | Recovery<br>(%) | RSDs<br>(%) | Recovery<br>(%) | RSDs<br>(%) | Recovery<br>(%) | RSDs<br>(%) |
| male   | 1            | $\alpha$ -E2 | 4.2±0.2 <sup>a</sup> | 89.7            | 2.8         | 86.6            | 3.9         | 89.4            | 4.9         |
|        |              | E1           | 5.6±0.4              | 94.2            | 4.8         | 97.3            | 3.7         | 94.1            | 4.8         |
|        |              | HEX          | n.d. <sup>b</sup>    | 91.2            | 3.5         | 90.7            | 3.5         | 96.3            | 3.4         |
|        | 2            | $\alpha$ -E2 | n.d.                 | 89.4            | 3.7         | 91.4            | 2.6         | 91.9            | 4.4         |
|        |              | E1           | n.d.                 | 96.7            | 4.7         | 99.5            | 4.1         | 101.4           | 6.4         |
|        |              | HEX          | 3.5±0.4              | 91.3            | 2.4         | 93.5            | 3.0         | 94.4            | 5.0         |
|        | 3            | $\alpha$ -E2 | n.d.                 | 95.4            | 5.4         | 98.0            | 5.1         | 99.7            | 7.8         |
|        |              | E1           | 4.6±0.7              | 95.6            | 4.1         | 98.3            | 3.2         | 100.0           | 5.2         |
|        |              | HEX          | n.d.                 | 88.5            | 3.5         | 90.5            | 2.3         | 90.8            | 4.1         |
|        | 4            | $\alpha$ -E2 | n.d.                 | 85.6            | 8.0         | 87.3            | 9.0         | 87.0            | 10.4        |
|        |              | E1           | 5.8±0.3              | 97.3            | 2.3         | 100.1           | 5.1         | 102.2           | 7.7         |
|        |              | HEX          | n.d.                 | 99.6            | 6.5         | 102.7           | 6.8         | 105.2           | 9.9         |
| 5      | $\alpha$ -E2 | 6.4±0.4      | 95.8                 | 1.7             | 95.0        | 5.7             | 97.1        | 1.7             |             |
|        | E1           | 9.7±0.2      | 104.7                | 2.1             | 99.4        | 2.9             | 102.2       | 3.0             |             |
|        | HEX          | 4.3±0.3      | 96.3                 | 2.2             | 91.6        | 2.5             | 98.2        | 2.5             |             |
| female | 6            | $\alpha$ -E2 | 6.4±0.2              | 97.2            | 10.3        | 100.0           | 6.5         | 102.1           | 9.5         |
|        |              | E1           | n.d.                 | 93.6            | 6.6         | 96.1            | 8.9         | 97.4            | 8.9         |
|        |              | HEX          | n.d.                 | 91.4            | 1.9         | 93.6            | 5.9         | 94.5            | 5.5         |
|        | 7            | $\alpha$ -E2 | 5.3±0.3              | 93.1            | 2.6         | 95.5            | 6.9         | 96.7            | 6.7         |
|        |              | E1           | 6.7±0.5              | 94.8            | 8.9         | 97.4            | 6.3         | 98.9            | 6.0         |
|        |              | HEX          | n.d.                 | 92.5            | 2.8         | 94.9            | 5.9         | 96.0            | 5.6         |
| 8      | $\alpha$ -E2 | 4.9±0.4      | 88.0                 | 3.1             | 89.9        | 6.3             | 90.1        | 5.9             |             |
|        | E1           | n.d.         | 92.8                 | 4.9             | 95.2        | 2.1             | 96.3        | 3.9             |             |
|        | HEX          | n.d.         | 95.5                 | 8.4             | 98.2        | 5.8             | 99.9        | 8.7             |             |

<sup>a</sup> mean ± standard deviation

<sup>b</sup> no detection
